# Supplementary material for: Arbuscular Mycorrhizal Fungus Rhizophagus irregularis Influences Artemisia annua Plant Parameters and Artemisinin Content under Different Soil Types and Cultivation Methods
Source: PubMed Central journal article supplement (PMC7356791; doi:10.3390/microorganisms8060899), 2020-06-15
Supplement: microorganisms-08-00899-s001.pdf [file microorganisms-08-00899-s001.pdf]

## Supplementary online materials

**Figure S1.** *Artemisia annua* planted in open field stagnic vertic Luvisol: control plants (a) and AMF-treated plants (b).

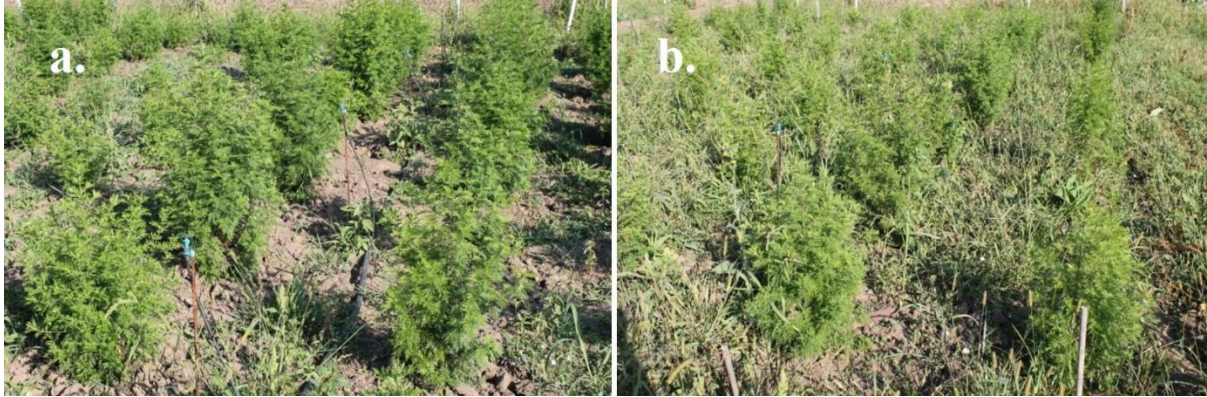

**Figure S2.** *Artemisia annua* plants glandular hair density on upper leaf epidermis under different growing conditions: Gleysol (a), Luvisol (b), Anthrosol (c), sterile peat (d) and open field of stagnic vertic Luvisol soil (e) (scanning electron microscope JEOL JSM-5200, Photos by László Jakab-Farkas).

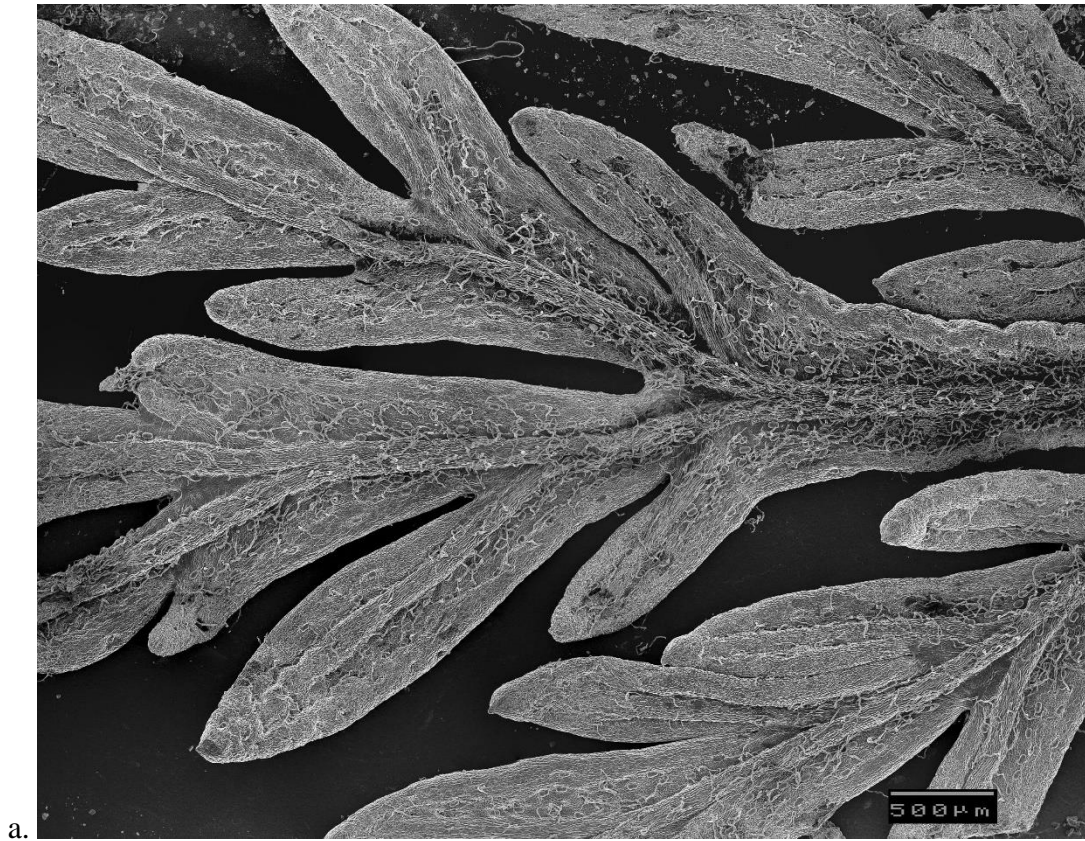

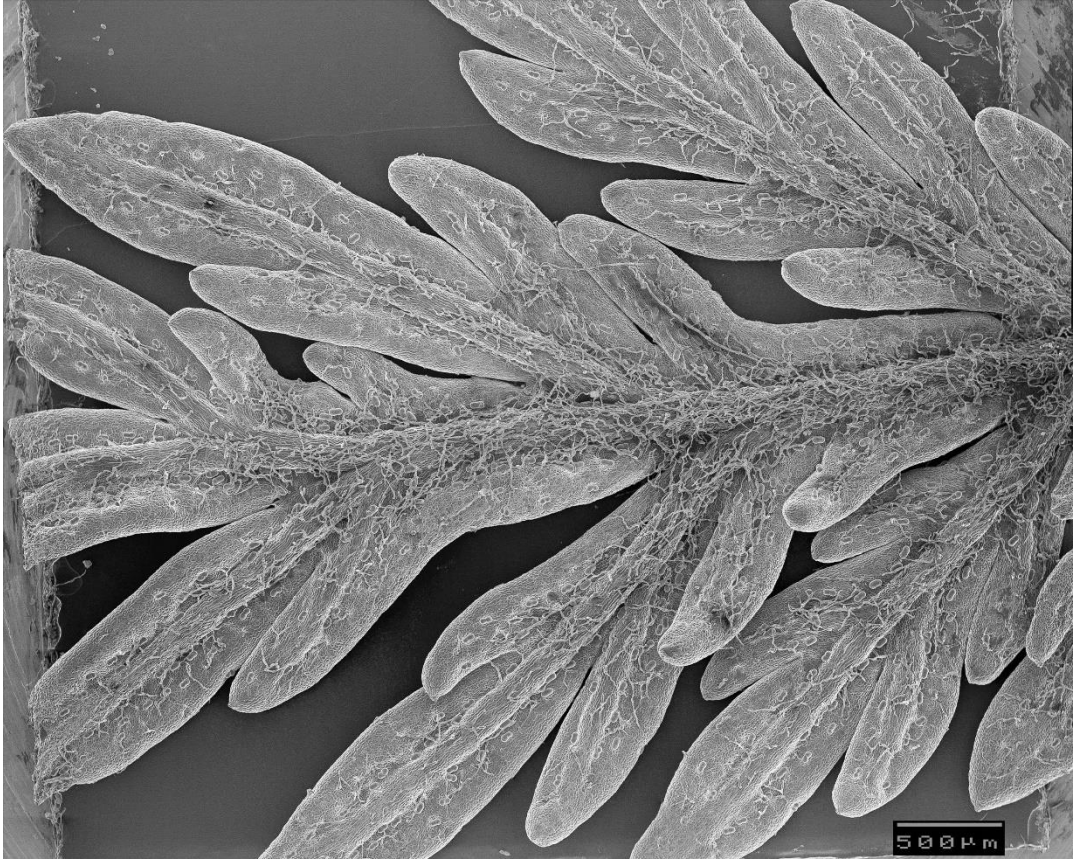

b.

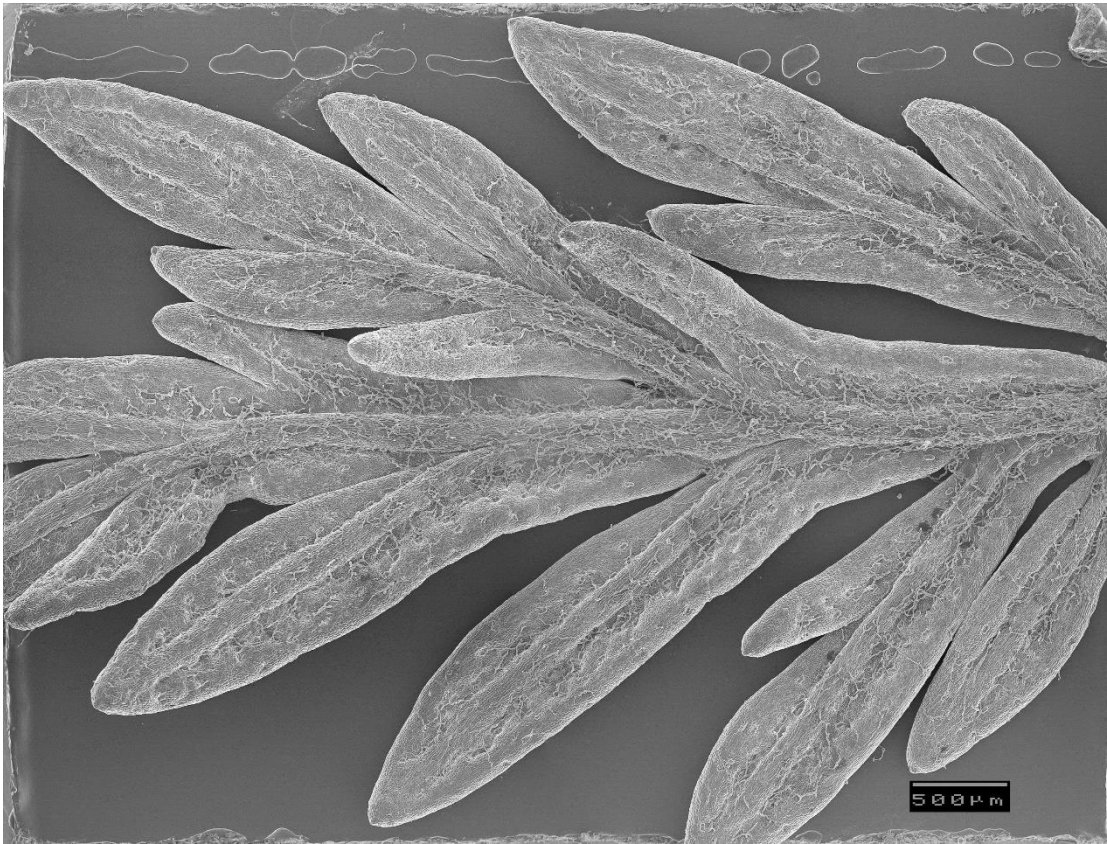

c.

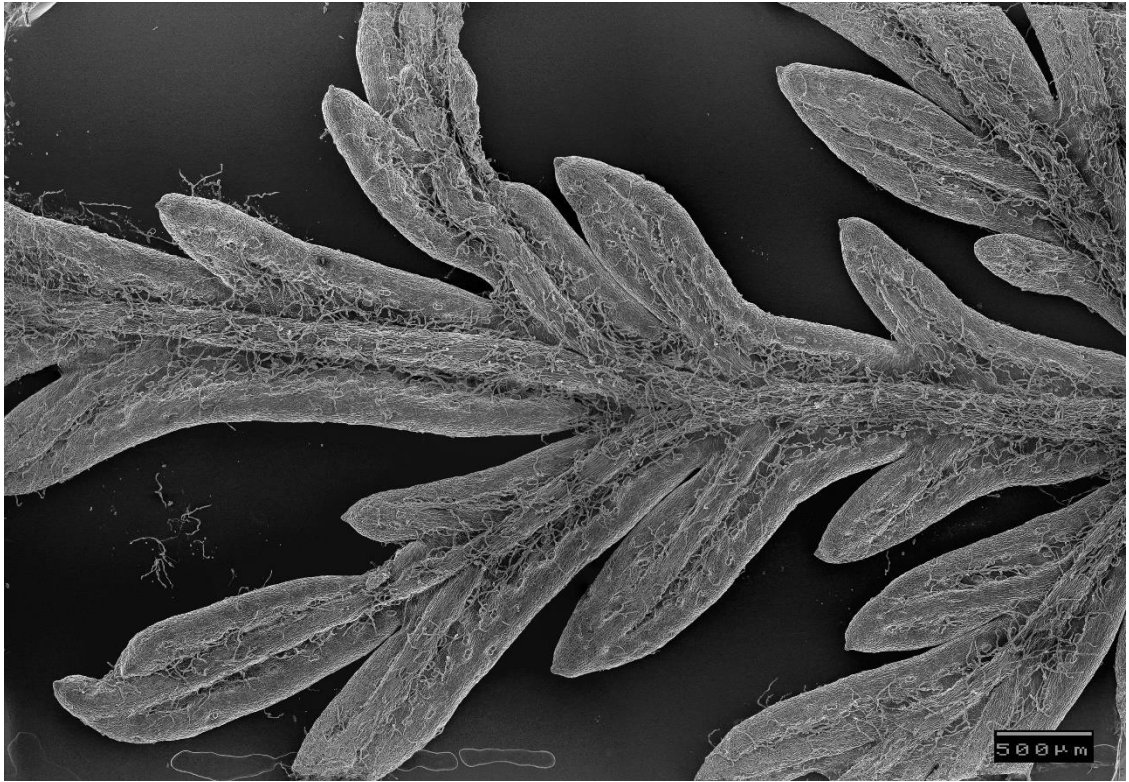

d.

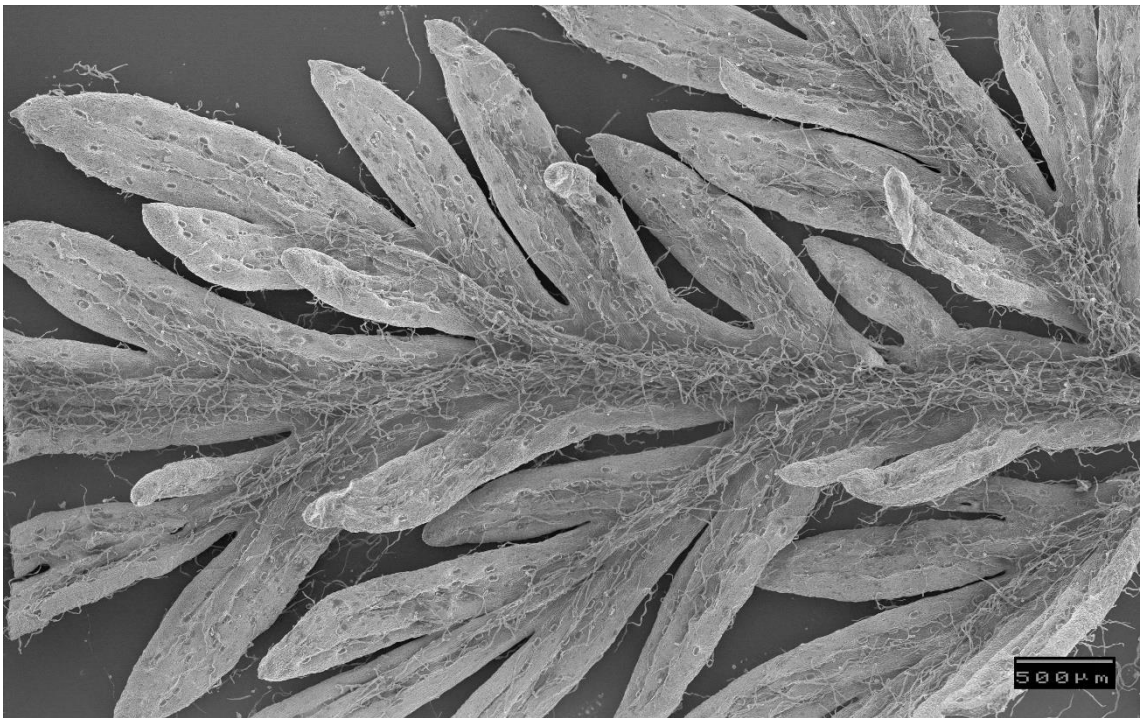

e.

**Table S1.** The measured leaf surfaces (mean±SD), the number of glandular hairs counted (mean±SD) on the measured leaf surfaces, and the density of glandular hairs / mm<sup>2</sup> (mean±SD) in case of control and AMF treated *Artemisia* plants.

|                 | Measured leaf surface (mm <sup>2</sup> ) |        | Number of hairs on the measured leaf surface |          | Glandular hair density / mm <sup>2</sup> |       |
|-----------------|------------------------------------------|--------|----------------------------------------------|----------|------------------------------------------|-------|
| Semi-open field |                                          |        |                                              |          |                                          |       |
| Control plants  | Mean                                     | ±SD    | Mean                                         | ±SD      | Mean                                     | ±SD   |
| Gleysol         | 186.908                                  | 14.842 | 3282.400                                     | 1417.776 | 17.335                                   | 6.920 |
| Luvisol         | 201.848                                  | 13.948 | 2574.000                                     | 1085.689 | 12.992                                   | 6.031 |
| Anthrosol       | 187.123                                  | 18.193 | 3264.800                                     | 584.109  | 17.578                                   | 3.457 |
| Sterile peat    | 173.237                                  | 12.855 | 2024.000                                     | 287.687  | 11.692                                   | 1.586 |
| AMF plants      | Mean                                     | ±SD    | Mean                                         | ±SD      | Mean                                     | ±SD   |
| Gleysol         | 168.788                                  | 9.142  | 3282.400                                     | 841.324  | 19.372                                   | 4.608 |
| Luvisol         | 172.471                                  | 10.899 | 3498.000                                     | 1254.965 | 20.099                                   | 6.753 |
| Anthrosol       | 198.950                                  | 15.847 | 4089.800                                     | 627.357  | 20.717                                   | 3.916 |
| Sterile peat    | 194.033                                  | 7.521  | 3018.400                                     | 298.686  | 15.585                                   | 1.760 |
| Open field      | Mean                                     | ±SD    | Mean                                         | ±SD      | Mean                                     | ±SD   |
| Control plants  | 175.150                                  | 31.364 | 4105.200                                     | 1357.834 | 24.005                                   | 8.145 |
| AMF plants      | 197.731                                  | 20.683 | 4419.800                                     | 1289.080 | 22.381                                   | 6.344 |

**Table S2.** The essential oil profile of the *Artemisia* plants under AMF treatment and without AMF (control) under semi-field (K1–control, G1-AMF treated) and open field conditions (K2–control, G2-AMF treated).

| Extraction   | G1<br>(%, ml/100 g fresh leaf) | K1<br>(%)       | G2<br>(%)    | K2<br>(%)      |
|--------------|--------------------------------|-----------------|--------------|----------------|
| 1            | 1.104                          | 0.576           | 1.25         | 0.427          |
| 2            | 0.999                          | 0.527           | 1.049        | 0.392          |
| 3            | 1.051                          | 0.553           | 1.149        | 0.409          |
| Mean<br>± SD | 1.052<br>± 0.052               | 0.552<br>±0.024 | 1.15<br>±0.1 | 0.41<br>±0.017 |

| Components             | K1 (%) | G1 (%) | K2 (%) | G2 (%) |
|------------------------|--------|--------|--------|--------|
| Sabinene               | 0.39   | 0.40   | 0.58   | 0.34   |
| β-pinene               | 4.50   | 5.45   | 5.50   | 3.17   |
| β-myrcene              | 1.03   | 1.46   | 1.16   | 0.57   |
| alpha-terpinene        | 0.26   | 0.27   | 0.29   | 0.00   |
| p-cymene               | 1.03   | 1.06   | 2.17   | 0.79   |
| Limonene               | 0.00   | 0.27   | 0.43   | 0.00   |
| 1.8-cineole            | 5.78   | 4.12   | 4.19   | 3.05   |
| gamma-terpinene        | 0.64   | 0.66   | 0.72   | 0.57   |
| cis-sabinene-hydrate   | 0.26   | 0.40   | 0.29   | 0.00   |
| Terpinolene            | 0.13   | 0.13   | 0.14   | 0.00   |
| trans-sabinene-hydrate | 0.26   | 0.27   | 0.29   | 0.00   |
| m-cymene               | 0.00   | 0.00   | 1.30   | 0.34   |
| chrysanthenone         | 0.77   | 0.66   | 0.87   | 0.00   |
| Camphor                | 33.55  | 35.08  | 32.11  | 26.92  |
| Pinocarvone            | 1.16   | 1.33   | 1.16   | 0.90   |
| Borneol                | 1.29   | 0.80   | 0.58   | 0.45   |
| Pinocamphone           | 0.26   | 0.27   | 0.29   | 0.00   |

|                              |       |       |       |       |
|------------------------------|-------|-------|-------|-------|
| terpinen-4-ol                | 1.16  | 1.06  | 0.87  | 0.79  |
| alpha-terpineol              | 0.39  | 0.27  | 0.43  | 0.00  |
| Myrtenol                     | 2.31  | 2.53  | 2.31  | 1.92  |
| cis-carveol                  | 0.64  | 0.53  | 0.87  | 0.00  |
| D-carvone                    | 0.26  | 0.27  | 0.14  | 0.00  |
| Bornyl- acetate              | 0.13  | 0.13  | 0.29  | 0.00  |
| Eugenol                      | 0.51  | 0.40  | 0.29  | 0.00  |
| alfa-cubebene                | 0.51  | 0.53  | 0.72  | 1.02  |
| beta-caryophyllene           | 3.47  | 3.46  | 3.04  | 4.52  |
| Humulene                     | 0.26  | 0.27  | 0.43  | 0.00  |
| beta-farnesene               | 8.10  | 8.38  | 7.52  | 16.85 |
| germacrene D                 | 10.67 | 11.57 | 12.00 | 23.52 |
| alpha-guaiene                | 0.00  | 1.33  | 1.88  | 0.90  |
| Elemene                      | 1.29  | 1.33  | 1.45  | 2.38  |
| Gurjunene                    | 0.26  | 0.27  | 1.74  | 0.00  |
| Spathulenol                  | 1.16  | 1.06  | 1.01  | 2.04  |
| caryophyllene-oxide          | 2.06  | 1.73  | 1.45  | 1.81  |
| Copaene                      | 1.41  | 1.46  | 1.59  | 0.90  |
| alpha-bisabolol              | 5.14  | 4.79  | 2.89  | 1.47  |
| Total                        | 91.00 | 94.00 | 93.00 | 95.23 |
| Monoterpene hydrocarbons (%) | 12.98 | 13.63 | 15.87 | 8.40  |
| Oxygenated monoterpenes (%)  | 38.60 | 40.73 | 37.39 | 29.51 |
| Sesquiterpenes (%)           | 31.23 | 34.00 | 33.22 | 52.77 |
